# Supplementary material for: Mitotic granule cell precursors undergo highly dynamic morphological transitions throughout the external germinal layer of the chick cerebellum
Source: PubMed Central journal article supplement (PMC6811643; doi:10.1038/s41598-019-51532-y), 2019-10-23
Supplement: 41598_2019_51532_MOESM4_ESM.pdf [file 41598_2019_51532_MOESM4_ESM.pdf]

## Supplementary data

### **Mitotic granule cell precursors undergo highly dynamic morphological transitions throughout the external germinal layer of the chick cerebellum**

Michalina Hanzel<sup>1</sup>, Victoria Rook<sup>1,2</sup>, Richard JT Wingate<sup>1\*</sup>

\*Corresponding author (richard.wingate@kcl.ac.uk)

<sup>1</sup> MRC Centre for Neurodevelopmental Disorders  
King's College London, Institute of Psychiatry, Psychology and Neuroscience  
4<sup>th</sup> floor New Hunt's House, Guy's Campus  
London  
UK

<sup>2</sup> School of Biological and Chemical Sciences,  
Queen Mary University of London,  
Mile End Road  
London, E4 1NS  
UK

### **Mitotic granule cell precursors undergo highly dynamic morphological transitions throughout the external germinal layer of the chick cerebellum**

Michalina Hanzel<sup>1</sup>, Victoria Rook<sup>1,2</sup>, Richard JT Wingate<sup>1\*</sup>

\*Corresponding author (richard.wingate@kcl.ac.uk)

<sup>1</sup> MRC Centre for Neurodevelopmental Disorders  
King's College London, Institute of Psychiatry, Psychology and Neuroscience  
4<sup>th</sup> floor New Hunt's House, Guy's Campus  
London  
UK

<sup>2</sup> School of Biological and Chemical Sciences,  
Queen Mary University of London,  
Mile End Road  
London, E4 1NS  
UK

**Supplementary Movie 1**

A time-lapse movie showing a dividing GCP extending and retracting multiple, highly motile processes before cell division.

**Supplementary Movie 2**

A time-lapse movie showing two dividing GCPs retracting all processes and rounding up before cell division.

**Supplementary Movie 3**

A time-lapse movie showing a dividing GCP described in Figure 5.
